# Supplementary material for: Cascade fractionation of poplar into xylose, glucan oligomers and less-condensed lignin via synergistic formic acid–LiBr molten salt hydrate pretreatment
Source: Royal Society of Chemistry journal article supplement (doi:10.1039/d4gc05494f), 2025-01-01
Supplement: d4gc05494f1.pdf [file d4gc05494f1.pdf]

## Supporting Information

### **Cascade fractionation of poplar into xylose, glucan oligomers and less-condensed lignin via synergistic formic acid–LiBr molten salt hydrate pretreatment**

Weiyu Xia,<sup>a</sup> Lupeng Shao,<sup>\*a</sup> Chao Wang,<sup>a</sup> Yu Liu,<sup>a</sup> Xianhai Zeng,<sup>c</sup> and Feng Xu<sup>a, b</sup>

<sup>a</sup> Key Laboratory of Pulp and Paper Science & Technology of Ministry of Education, Qilu University of Technology (Shandong Academy of Sciences), Jinan, 250353, China

<sup>b</sup> Beijing Key Laboratory of Lignocellulosic Chemistry, Beijing Forestry University, Beijing, 100083, China

<sup>c</sup> College of Energy, Xiamen University, Xiamen, 361102, China

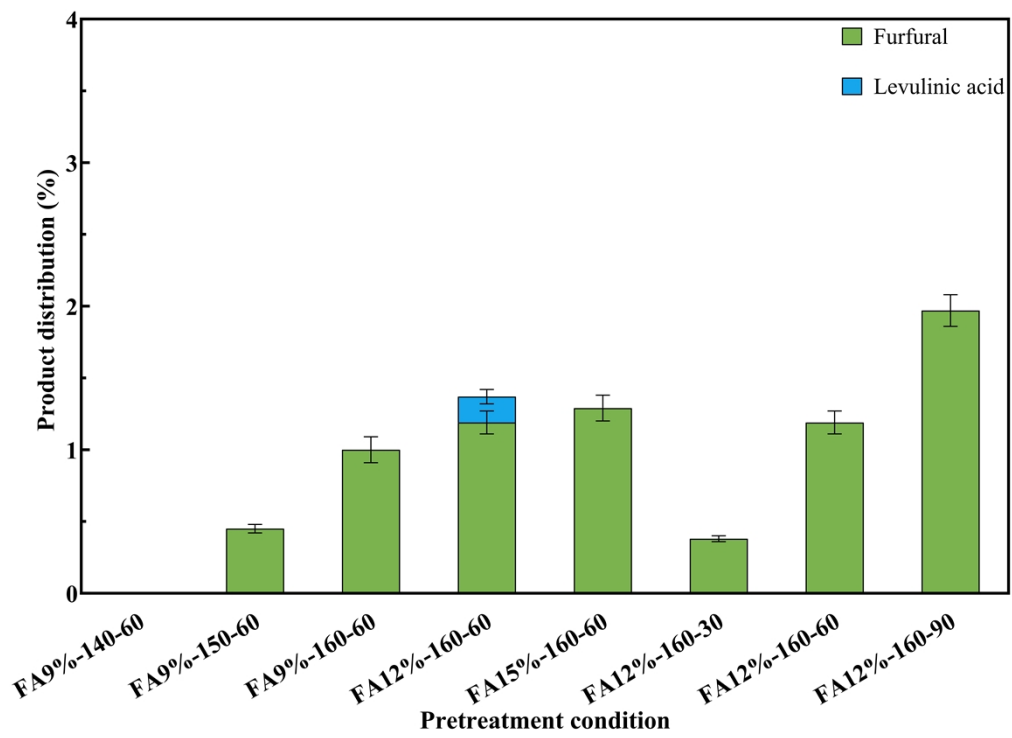

Fig. S1 The content of furfural and levulinic acid in the hydrolysate during FA pretreatment

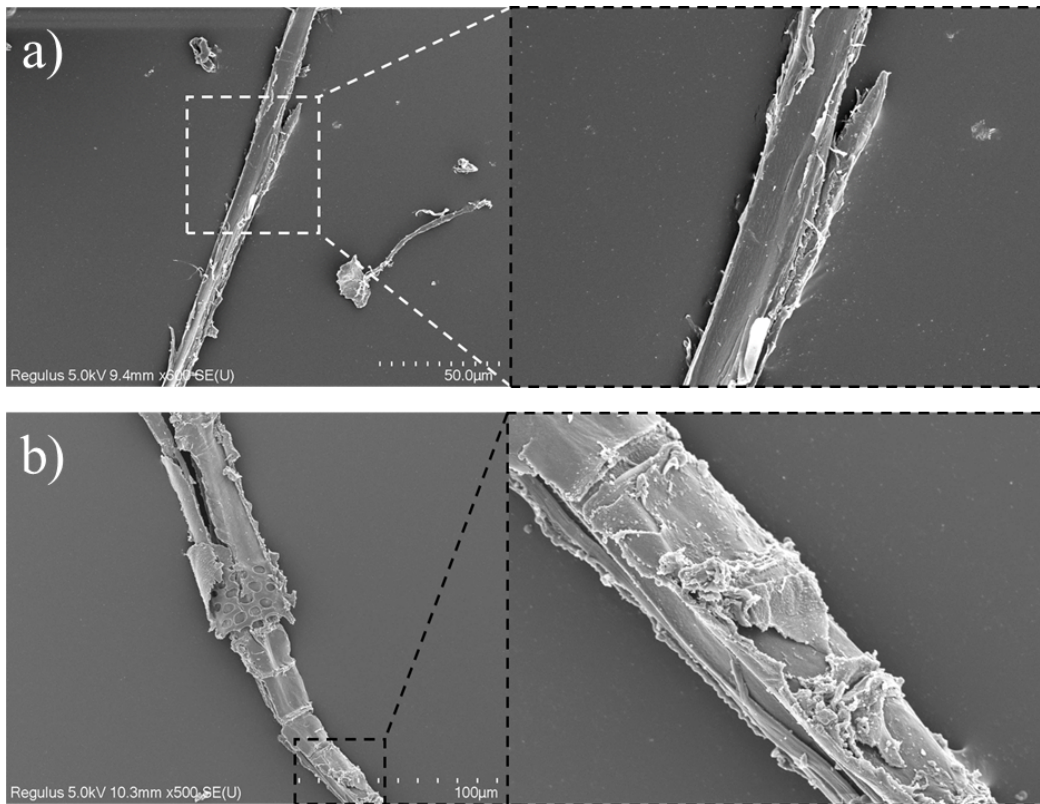

Fig. S2 Morphological characteristics of the control poplar (a) and FA-pretreated substrate (b)

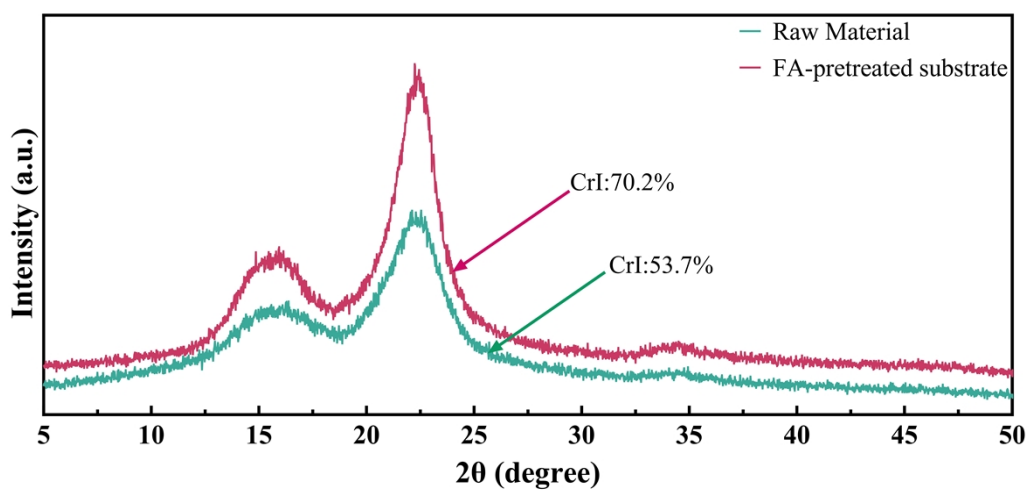

Fig. S3 The XRD pattern of raw material and FA-pretreated substrate



Table S1 Comparison of results of different treatment

|                            | Ref <sup>1</sup> | Ref <sup>2</sup> | This Work                |
|----------------------------|------------------|------------------|--------------------------|
| Raw material               | Corn stover      | Cellulose        | Poplar                   |
| Pretreatment               | Auto-hydrolysis  | /                | 12 wt% FA                |
| Reaction conditions        | 190 °C, 20 min   | /                | 160 °C, 1h               |
| Hemicellulose removal rate | 94.4%            | /                | 91.24%                   |
| MSH                        | 60 wt% LiBr      | 60 wt% LiBr      | 60 wt% LiBr              |
| Reaction conditions        | 130 °C, 2h       | 130 °C, 5h       | 100°C, 0.5h,<br>30mM HCl |
| Glucan oligomers yield     | 59.9%            | 90.4%            | 42.68%                   |
| Glucose yield              | 21.4%            |                  | 41.87%                   |

Table S2 The purity and yield of lignin samples

| Lignin samples (L <sub>a/b-c</sub> ) | Yield of acid-insoluble lignin (%) | Yield of acid-soluble lignin (%) | Purity (%) |
|--------------------------------------|------------------------------------|----------------------------------|------------|
| L <sub>C</sub> /40 mM-110°C          | 81.35                              | 6.18                             | 87.53      |
| L <sub>FA</sub> /20 mM-90°C          | 40.77                              | 3.32                             | 44.09      |
| L <sub>FA</sub> /20 mM-100°C         | 73.22                              | 3.57                             | 76.79      |
| L <sub>FA</sub> /20 mM-110°C         | 88.80                              | 3.32                             | 92.12      |
| L <sub>FA</sub> /30 mM-90°C          | 62.84                              | 3.66                             | 66.50      |
| L <sub>FA</sub> /30 mM-100°C         | 91.73                              | 3.84                             | 95.57      |
| L <sub>FA</sub> /30 mM-110°C         | 91.86                              | 3.44                             | 95.30      |
| L <sub>FA</sub> /40 mM-90°C          | 69.09                              | 3.58                             | 72.67      |
| L <sub>FA</sub> /40 mM-100°C         | 92.68                              | 3.70                             | 96.38      |
| L <sub>FA</sub> /40 mM-110°C         | 94.04                              | 3.34                             | 97.38      |

L<sub>a/b-c</sub>: a-Conventional or Formic Acid, b-HCl concentration, c-Temperature

Table S3 2D HSQC NMR data for the signal assignments in lignin

| Lable              | $\delta_C/\delta_H(\text{ppm})$ | Assignment                                                                            |
|--------------------|---------------------------------|---------------------------------------------------------------------------------------|
| A $_{\alpha}$      | 71.58/4.86                      | C $_{\alpha}$ -H $_{\alpha}$ in $\beta$ -O-4 (A)                                      |
| OMe                | 56.63/3.72                      | C-H in Methoxy                                                                        |
| A $_{\gamma}$      | 59.46/3.23-3.64                 | C $_{\gamma}$ -H $_{\gamma}$ in $\beta$ -O-4 (A)                                      |
| I $_{\gamma}$      | 61.42/4.09                      | C $_{\gamma}$ -H $_{\gamma}$ in <i>p</i> -hydroxycinnamyl alcohol end-groups          |
| C $_{\alpha}$      | 86.48-87.61/5.44-5.59           | C $_{\alpha}$ -H $_{\alpha}$ in Phenylcoumarin substructure                           |
| C $_{\gamma}$      | 62.49/3.70                      | C $_{\gamma}$ -H $_{\gamma}$ in Phenylcoumarin substructure                           |
| B $_{\alpha}$      | 83.19-84.87/4.81-4.65           | C $_{\alpha}$ -H $_{\alpha}$ in $\beta$ - $\beta$ resinol substructures (B)           |
| B $_{\beta}$       | 53.25/3.03                      | C $_{\beta}$ -H $_{\beta}$ in $\beta$ - $\beta$ resinol substructures (B)             |
| B $_{\gamma}$      | 70.18-71.10/3.82-4.19           | C $_{\gamma}$ -H $_{\gamma}$ in $\beta$ - $\beta$ resinol substructures (B)           |
| X $_2$             | 69.68/3.51                      | C $_2$ -H $_2$ in $\beta$ -D-xylopyranoside (X)                                       |
| X $_3$             | 72.27/3.21-3.43                 | C $_3$ -H $_3$ in $\beta$ -D-xylopyranoside (X)                                       |
| X $_4$             | 74.17/3.22-3.50                 | C $_4$ -H $_4$ in $\beta$ -D-xylopyranoside (X)                                       |
| A $_{\beta}$ (G/H) | 83.47/4.26-4.45                 | C $_{\beta}$ -H $_{\beta}$ in $\beta$ -O-4 linked to G/H (A)                          |
| A $_{\beta}$ (S)   | 85.72-87.11/3.96-4.08           | C $_{\beta}$ -H $_{\beta}$ in $\beta$ -O-4 linked to S (A)                            |
| BD $_{\alpha}$     | 75.48/4.89                      | C $_{\alpha}$ -H $_{\alpha}$ in benzodioxane substructures                            |
| HK $_{\alpha}$     | 44.34/3.65                      | C $_{\alpha}$ -H $_{\alpha}$ in Hibbert ketone                                        |
| HK $_{\gamma}$     | 66.99/4.15                      | C $_{\gamma}$ -H $_{\gamma}$ in Hibbert ketone                                        |
| S $_{2,6}$         | 103.42/6.70                     | C $_{2,6}$ -H $_{2,6}$ in syringyl units (S)                                          |
| S' $_{2,6}$        | 106.41/7.30                     | C $_{2,6}$ -H $_{2,6}$ in oxidized S units (S')                                       |
| S'' $_{2,6}$       | 106.68/6.49                     | C $_{2,6}$ -H $_{2,6}$ in condensed S units (S'')                                     |
| G $_2$             | 110.47/6.96                     | C $_2$ -H $_2$ in guaiacyl units (G)                                                  |
| G $_5$             | 114.69/6.78                     | C $_5$ -H $_5$ in guaiacyl units (G)                                                  |
| G $_6$             | 118.74/6.78                     | C $_6$ -H $_6$ in guaiacyl units (G)                                                  |
| PB $_{2,6}$        | 131.17/7.50-7.87                | C $_{2,6}$ -H $_{2,6}$ in benzoate                                                    |
| I $_{\alpha}$      | 128.18/6.22                     | C $_{\alpha}$ -H $_{\alpha}$ in acylated cinnamyl alcohol                             |
| I $_{\beta}$       | 128.39/6.45                     | C $_{\beta}$ -H $_{\beta}$ in acylated cinnamyl alcohol                               |
| I' $_{\gamma}$     | 125.95/6.77                     | C $_{\gamma}$ -H $_{\gamma}$ in acylated <i>p</i> -hydroxycinnamyl alcohol end-groups |

## References

1. Q. Liu, L. Zhou, X. Xie, D. Fan, X. Ouyang, W. Fan and X. Qiu, *Green Chem.*, 2022, **24**, 8812-8819.
2. Q. Liu, Q. Ma, S. Sabnis, W. Zheng, D. G. Vlachos, W. Fan, W. Li and L. Ma, *Green Chem.*, 2019, **21**, 5030-5038.
